# Supplementary material for: A facile synthesis of Au-nanoparticles decorated PbI2 single crystalline nanosheets for optoelectronic device applications
Source: PubMed Central journal article supplement (PMC6138657; doi:10.1038/s41598-018-32038-5), 2018-09-14
Supplement: 41598_2018_32038_MOESM1_ESM.pdf [file 41598_2018_32038_MOESM1_ESM.pdf]

*A facile synthesis of Au-nanoparticles decorated PbI<sub>2</sub> single crystalline nanosheets for optoelectronic device applications*

*Mohd. Shkir<sup>1</sup>, I.S. Yahia<sup>1</sup>, V. Ganesh<sup>1</sup>, Y. Bitla<sup>2</sup>, I.M. Ashraf<sup>1,4</sup>, Ajeet Kaushik<sup>3</sup>, S. AlFaify\*<sup>1</sup>*

<sup>1</sup>*Advanced Functional Materials and Optoelectronics Laboratory (AFMOL), Department of Physics, College of Science, King Khalid University, Abha 61413, P.O. Box 9004, Saudi Arabia*

<sup>2</sup>*Department of Physics, Indian Institute of Science, Bangalore 560012 India*

<sup>3</sup>*Centre of Personalized Nanomedicine, Institute of Neuroimmune Pharmacology, Department of Immunology, Herbert Wertheim College of Medicine, Florida International University, Miami, FL-33199 USA*

<sup>4</sup>*Department of Physics, Faculty of Science, Aswan University, Aswan , Egypt*

Ag PbI<sub>2</sub>SCNSs Ag

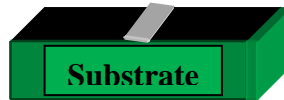

Scheme I: Simple design of sample for electrical measurements

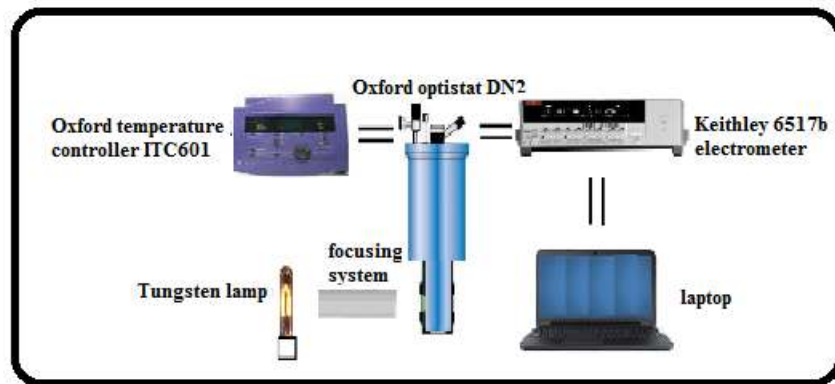

Scheme II: Schematic diagram for photoconductivity measurement
